# Supplementary material
Source: PubMed Central journal article supplement (PMC4442434)
Supplement: JVI.00005-15_zjv999090411so1.pdf [file JVI.00005-15_zjv999090411so1.pdf]

**Supplementary Table 1A**

| <b>p-values Comparing IL-1<math>\beta</math> Expression Between Tissue Macrophages</b> |            |              |                |              |               |                     |
|----------------------------------------------------------------------------------------|------------|--------------|----------------|--------------|---------------|---------------------|
|                                                                                        | <b>ALN</b> | <b>Colon</b> | <b>Jejunum</b> | <b>Liver</b> | <b>Spleen</b> | <b>Stimulation:</b> |
| <b>ALN</b>                                                                             |            | <0.0001      | 0.0384         | <0.0001      | <0.0001       | LPS                 |
|                                                                                        |            | <0.0001      | NS             | <0.0001      | 0.0004        | BS-PGN              |
|                                                                                        |            | <0.0001      | NS             | <0.0001      | <0.0001       | EC-PGN              |
| <b>Colon</b>                                                                           | <0.0001    |              | <0.0001        | <0.0001      | <0.0001       | LPS                 |
|                                                                                        | <0.0001    |              | <0.0001        | 0.0008       | 0.0017        | BS-PGN              |
|                                                                                        | <0.0001    |              | <0.0001        | <0.0001      | <0.0001       | EC-PGN              |
| <b>Jejunum</b>                                                                         | 0.0384     | <0.0001      |                | <0.0001      | <0.0001       | LPS                 |
|                                                                                        | NS         | <0.0001      |                | <0.0001      | 0.0004        | BS-PGN              |
|                                                                                        | NS         | <0.0001      |                | <0.0001      | <0.0001       | EC-PGN              |
| <b>Liver</b>                                                                           | <0.0001    | <0.0001      | <0.0001        |              | NS            | LPS                 |
|                                                                                        | <0.0001    | 0.0008       | <0.0001        |              | NS            | BS-PGN              |
|                                                                                        | <0.0001    | <0.0001      | <0.0001        |              | NS            | EC-PGN              |
| <b>Spleen</b>                                                                          | <0.0001    | <0.0001      | <0.0001        | NS           |               | LPS                 |
|                                                                                        | 0.0004     | 0.0017       | <0.0001        | NS           |               | BS-PGN              |
|                                                                                        | <0.0001    | <0.0001      | <0.0001        | NS           |               | EC-PGN              |

**Supplementary Table 1B**

| <b>p-values Comparing IL-1<math>\beta</math> Expression Between Stimulus Conditions</b> |            |               |               |                |
|-----------------------------------------------------------------------------------------|------------|---------------|---------------|----------------|
|                                                                                         | <b>LPS</b> | <b>BS-PGN</b> | <b>EC-PGN</b> | <b>Tissue:</b> |
| <b>LPS</b>                                                                              |            | NS            | NS            | ALN            |
|                                                                                         |            | NS            | NS            | Colon          |
|                                                                                         |            | NS            | NS            | Jejunum        |
|                                                                                         |            | NS            | NS            | Liver          |
|                                                                                         |            | NS            | 0.0174        | Spleen         |
| <b>BS-PGN</b>                                                                           | NS         |               | NS            | ALN            |
|                                                                                         | NS         |               | NS            | Colon          |
|                                                                                         | NS         |               | NS            | Jejunum        |
|                                                                                         | NS         |               | NS            | Liver          |
|                                                                                         | NS         |               | 0.0013        | Spleen         |
| <b>EC-PGN</b>                                                                           | NS         | NS            |               | ALN            |
|                                                                                         | NS         | NS            |               | Colon          |
|                                                                                         | NS         | NS            |               | Jejunum        |
|                                                                                         | NS         | NS            |               | Liver          |
|                                                                                         | 0.0174     | 0.0013        |               | Spleen         |

**Supplemental Table 1. p-Values Comparing Stimulated Macrophage IL-1 $\beta$  Expression.**

**A.** *p*-Values comparing absolute IL-1 $\beta$ -expression among similar stimulation conditions, between macrophages from disparate tissues as shown in Figure 3A. Significance assessed by unpaired, two-tailed t-test. **B.** *p*-Values comparing absolute IL-1 $\beta$ -expression among similar tissue macrophages, between different stimuli. Significance assessed by paired, two-tailed t-test.

**Supplementary Table 2A**

| <b>p-values Comparing IL-6 Expression Between Tissue Macrophages</b> |            |              |                |              |               |                     |
|----------------------------------------------------------------------|------------|--------------|----------------|--------------|---------------|---------------------|
|                                                                      | <b>ALN</b> | <b>Colon</b> | <b>Jejunum</b> | <b>Liver</b> | <b>Spleen</b> | <b>Stimulation:</b> |
| <b>ALN</b>                                                           |            | <0.0001      | NS             | NS           | NS            | LPS                 |
|                                                                      |            | 0.0012       | NS             | NS           | NS            | BS-PGN              |
|                                                                      |            | <0.0001      | NS             | NS           | NS            | EC-PGN              |
| <b>Colon</b>                                                         | <0.0001    |              | <0.0001        | <0.0001      | <0.0001       | LPS                 |
|                                                                      | 0.0012     |              | 0.0243         | 0.0008       | 0.0017        | BS-PGN              |
|                                                                      | <0.0001    |              | 0.0001         | <0.0001      | <0.0001       | EC-PGN              |
| <b>Jejunum</b>                                                       | NS         | <0.0001      |                | NS           | NS            | LPS                 |
|                                                                      | NS         | 0.0243       |                | NS           | NS            | BS-PGN              |
|                                                                      | NS         | 0.0001       |                | NS           | NS            | EC-PGN              |
| <b>Liver</b>                                                         | NS         | <0.0001      | NS             |              | NS            | LPS                 |
|                                                                      | NS         | 0.0008       | NS             |              | NS            | BS-PGN              |
|                                                                      | NS         | <0.0001      | NS             |              | NS            | EC-PGN              |
| <b>Spleen</b>                                                        | NS         | <0.0001      | NS             | NS           |               | LPS                 |
|                                                                      | NS         | 0.0017       | NS             | NS           |               | BS-PGN              |
|                                                                      | NS         | <0.0001      | NS             | NS           |               | EC-PGN              |

**Supplementary Table 2B**

| <b>p-values Comparing IL-6 Expression Between Stimulus Conditions</b> |            |               |               |                |
|-----------------------------------------------------------------------|------------|---------------|---------------|----------------|
|                                                                       | <b>LPS</b> | <b>BS-PGN</b> | <b>EC-PGN</b> | <b>Tissue:</b> |
| <b>LPS</b>                                                            |            | NS            | NS            | ALN            |
|                                                                       |            | NS            | NS            | Colon          |
|                                                                       |            | NS            | NS            | Jejunum        |
|                                                                       |            | NS            | NS            | Liver          |
|                                                                       |            | NS            | 0.0174        | Spleen         |
| <b>BS-PGN</b>                                                         | NS         |               | NS            | ALN            |
|                                                                       | NS         |               | NS            | Colon          |
|                                                                       | NS         |               | NS            | Jejunum        |
|                                                                       | NS         |               | NS            | Liver          |
|                                                                       | NS         |               | 0.0013        | Spleen         |
| <b>EC-PGN</b>                                                         | NS         | NS            |               | ALN            |
|                                                                       | NS         | NS            |               | Colon          |
|                                                                       | NS         | NS            |               | Jejunum        |
|                                                                       | NS         | NS            |               | Liver          |
|                                                                       | 0.0174     | 0.0013        |               | Spleen         |

**Supplemental Table 2. p-Values Comparing Stimulated Macrophage IL-6 Expression.**

**A.** p-Values comparing absolute IL-6-expression among similar stimulation conditions, between macrophages from disparate tissues as shown in Figure 3B. Significance assessed by unpaired, two-tailed t-test. **B.** p-Values comparing absolute IL-6-expression among similar tissue macrophages, between different stimuli. Significance assessed by paired, two-tailed t-test.

**Supplementary Table 3A**

| <b>p-values Comparing TNF<math>\alpha</math> Expression Between Tissue Macrophages</b> |            |              |                |              |               |                     |
|----------------------------------------------------------------------------------------|------------|--------------|----------------|--------------|---------------|---------------------|
|                                                                                        | <b>ALN</b> | <b>Colon</b> | <b>Jejunum</b> | <b>Liver</b> | <b>Spleen</b> | <b>Stimulation:</b> |
| <b>ALN</b>                                                                             |            | 0.0099       | 0.0229         | NS           | 0.0004        | LPS                 |
|                                                                                        |            | NS           | NS             | NS           | 0.0050        | BS-PGN              |
|                                                                                        |            | 0.0095       | NS             | NS           | 0.0014        | EC-PGN              |
| <b>Colon</b>                                                                           | 0.0099     |              | NS             | 0.0172       | <0.0001       | LPS                 |
|                                                                                        | NS         |              | NS             | NS           | 0.0116        | BS-PGN              |
|                                                                                        | 0.0095     |              | 0.0324         | 0.0078       | 0.0002        | EC-PGN              |
| <b>Jejunum</b>                                                                         | 0.0229     | NS           |                | NS           | <0.0001       | LPS                 |
|                                                                                        | NS         | NS           |                | NS           | 0.0052        | BS-PGN              |
|                                                                                        | NS         | 0.0324       |                | NS           | 0.0004        | EC-PGN              |
| <b>Liver</b>                                                                           | NS         | 0.0172       | NS             |              | 0.0130        | LPS                 |
|                                                                                        | NS         | NS           | NS             |              | 0.0161        | BS-PGN              |
|                                                                                        | NS         | 0.0078       | NS             |              | 0.0283        | EC-PGN              |
| <b>Spleen</b>                                                                          | 0.0004     | <0.0001      | <0.0001        | 0.0130       |               | LPS                 |
|                                                                                        | 0.0050     | 0.0116       | 0.0052         | 0.0161       |               | BS-PGN              |
|                                                                                        | 0.0014     | 0.0002       | 0.0004         | 0.0283       |               | EC-PGN              |

**Supplementary Table 3B**

| <b>p-values Comparing TNF<math>\alpha</math> Expression Between Stimulus Conditions</b> |            |               |               |                |
|-----------------------------------------------------------------------------------------|------------|---------------|---------------|----------------|
|                                                                                         | <b>LPS</b> | <b>BS-PGN</b> | <b>EC-PGN</b> | <b>Tissue:</b> |
| <b>LPS</b>                                                                              |            | NS            | NS            | ALN            |
|                                                                                         |            | NS            | NS            | Colon          |
|                                                                                         |            | NS            | 0.0289        | Jejunum        |
|                                                                                         |            | NS            | NS            | Liver          |
|                                                                                         |            | NS            | 0.0122        | Spleen         |
| <b>BS-PGN</b>                                                                           | NS         |               | NS            | ALN            |
|                                                                                         | NS         |               | NS            | Colon          |
|                                                                                         | NS         |               | NS            | Jejunum        |
|                                                                                         | NS         |               | NS            | Liver          |
|                                                                                         | NS         |               | 0.0021        | Spleen         |
| <b>EC-PGN</b>                                                                           | NS         | NS            |               | ALN            |
|                                                                                         | NS         | NS            |               | Colon          |
|                                                                                         | 0.0289     | NS            |               | Jejunum        |
|                                                                                         | NS         | NS            |               | Liver          |
|                                                                                         | 0.0122     | 0.0021        |               | Spleen         |

**Supplemental Table 3. p-Values Comparing Stimulated Macrophage TNF $\alpha$  Expression.**

**A.** *p*-Values comparing absolute TNF $\alpha$ -expression among similar stimulation conditions, between macrophages from disparate tissues as shown in Figure 3C. Significance assessed by unpaired, two-tailed t-test. **B.** *p*-Values comparing absolute TNF $\alpha$ -expression among similar tissue macrophages, between different stimuli. Significance assessed by paired, two-tailed t-test.

**Supplementary Table 4A**

| <b>p-values Comparing Functionality Between Tissue Macrophages</b> |            |              |                |              |               |                     |
|--------------------------------------------------------------------|------------|--------------|----------------|--------------|---------------|---------------------|
|                                                                    | <b>ALN</b> | <b>Colon</b> | <b>Jejunum</b> | <b>Liver</b> | <b>Spleen</b> | <b>Stimulation:</b> |
| <b>ALN</b>                                                         |            | <0.0001      | NS             | NS           | 0.0020        | LPS                 |
|                                                                    |            | 0.0002       | NS             | NS           | 0.0025        | BS-PGN              |
|                                                                    |            | <0.0001      | NS             | NS           | 0.0015        | EC-PGN              |
| <b>Colon</b>                                                       | <0.0001    |              | <0.0001        | <0.0001      | <0.0001       | LPS                 |
|                                                                    | 0.0002     |              | 0.0175         | 0.0011       | 0.0063        | BS-PGN              |
|                                                                    | <0.0001    |              | <0.0001        | <0.0001      | <0.0001       | EC-PGN              |
| <b>Jejunum</b>                                                     | NS         | <0.0001      |                | NS           | 0.0024        | LPS                 |
|                                                                    | NS         | 0.0175       |                | NS           | 0.0333        | BS-PGN              |
|                                                                    | NS         | 0.0000       |                | NS           | 0.0072        | EC-PGN              |
| <b>Liver</b>                                                       | NS         | <0.0001      | NS             |              | 0.0381        | LPS                 |
|                                                                    | NS         | 0.0011       | NS             |              | 0.0173        | BS-PGN              |
|                                                                    | NS         | <0.0001      | NS             |              | NS            | EC-PGN              |
| <b>Spleen</b>                                                      | 0.0020     | <0.0001      | 0.0024         | 0.0381       |               | LPS                 |
|                                                                    | 0.0025     | 0.0063       | 0.0333         | 0.0173       |               | BS-PGN              |
|                                                                    | 0.0015     | <0.0001      | 0.0072         | NS           |               | EC-PGN              |

**Supplementary Table 4B**

| <b>p-values Comparing Functionality Between Stimulus Conditions</b> |            |               |               |                |
|---------------------------------------------------------------------|------------|---------------|---------------|----------------|
|                                                                     | <b>LPS</b> | <b>BS-PGN</b> | <b>EC-PGN</b> | <b>Tissue:</b> |
| <b>LPS</b>                                                          |            | NS            | NS            | ALN            |
|                                                                     |            | NS            | NS            | Colon          |
|                                                                     |            | NS            | NS            | Jejunum        |
|                                                                     |            | NS            | NS            | Liver          |
|                                                                     |            | NS            | 0.1412        | Spleen         |
| <b>BS-PGN</b>                                                       | NS         |               | NS            | ALN            |
|                                                                     | NS         |               | NS            | Colon          |
|                                                                     | NS         |               | NS            | Jejunum        |
|                                                                     | NS         |               | NS            | Liver          |
|                                                                     | NS         |               | 0.1939        | Spleen         |
| <b>EC-PGN</b>                                                       | NS         | NS            |               | ALN            |
|                                                                     | NS         | NS            |               | Colon          |
|                                                                     | NS         | NS            |               | Jejunum        |
|                                                                     | NS         | NS            |               | Liver          |
|                                                                     | 0.1412     | 0.1939        |               | Spleen         |

**Supplemental Table 4. p-Values Comparing Stimulated Macrophage Cytokine Expression.**

**A.** p-Values comparing the absolute percent of any cytokine (IL-1 $\beta$ , IL-6 or TNF $\alpha$ ) expression among similar stimulation conditions, between macrophages from disparate tissues as shown in Figure 3D. Significance assessed by unpaired, two-tailed t-test. **B.** p-Values comparing the absolute percent of any cytokine expression among similar tissue macrophages, between different stimuli. Significance assessed by paired, two-tailed t-test.

All Macrophages (Unstimulated)

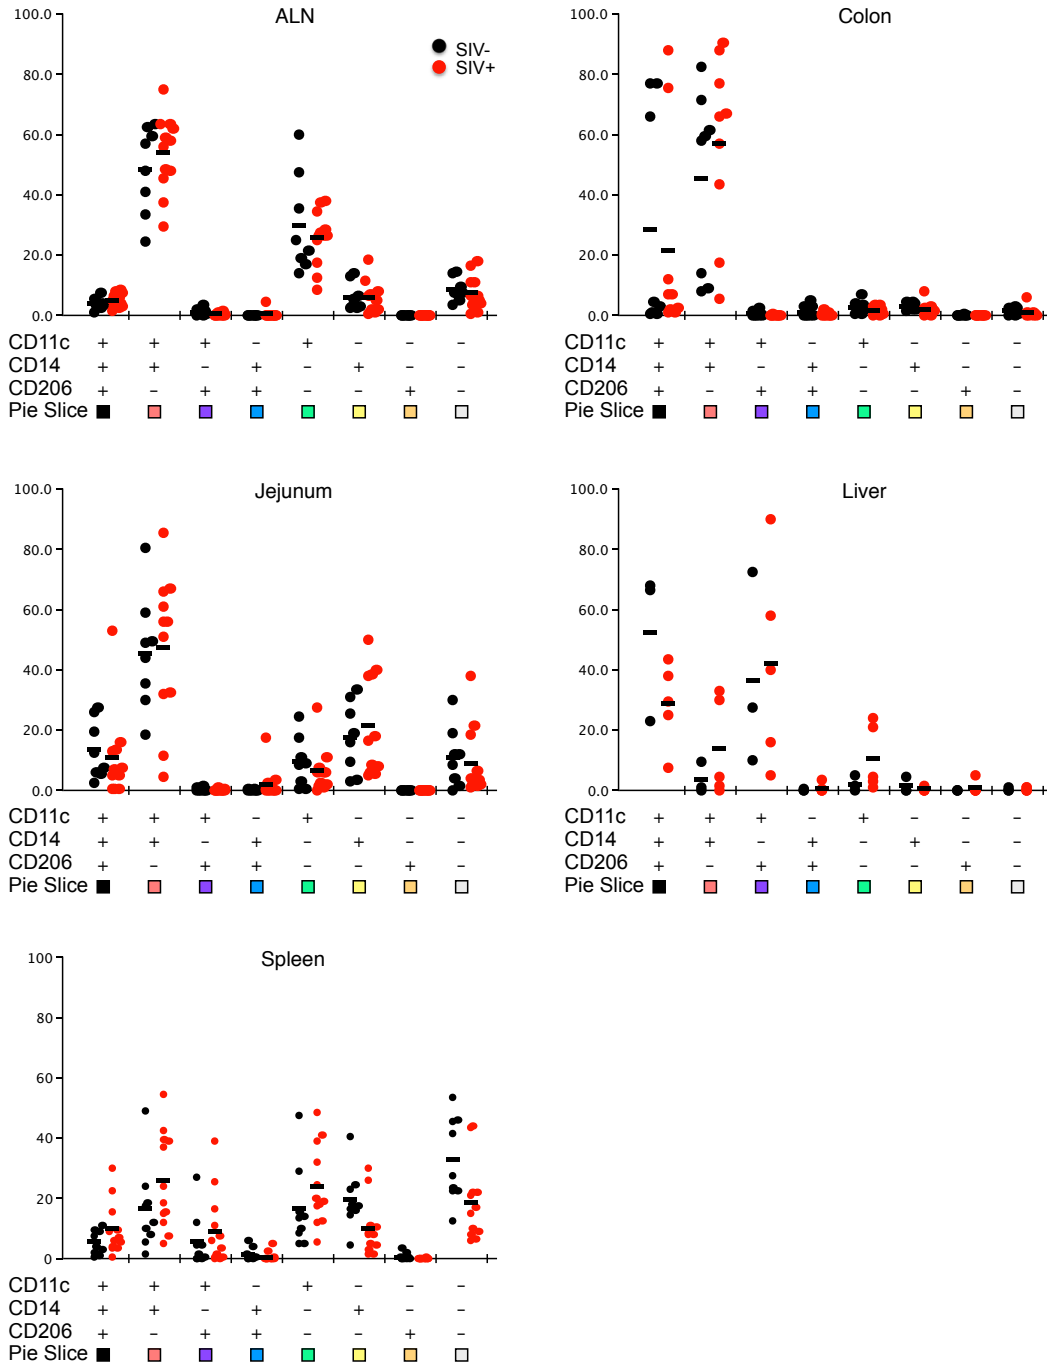

**Supplementary Figure 1 – Absolute values of phenotypic subsets among unstimulated, bulk macrophages from SIV-uninfected animals.** Absolute percent of unstimulated macrophages from SIV-uninfected (black circles) and SIV-infected (red circles) animals expressing the indicated phenotype, in reference to relative expression pie charts as shown in Figure 2B. Line represents mean of population.

*All Macrophages (SIV-)*

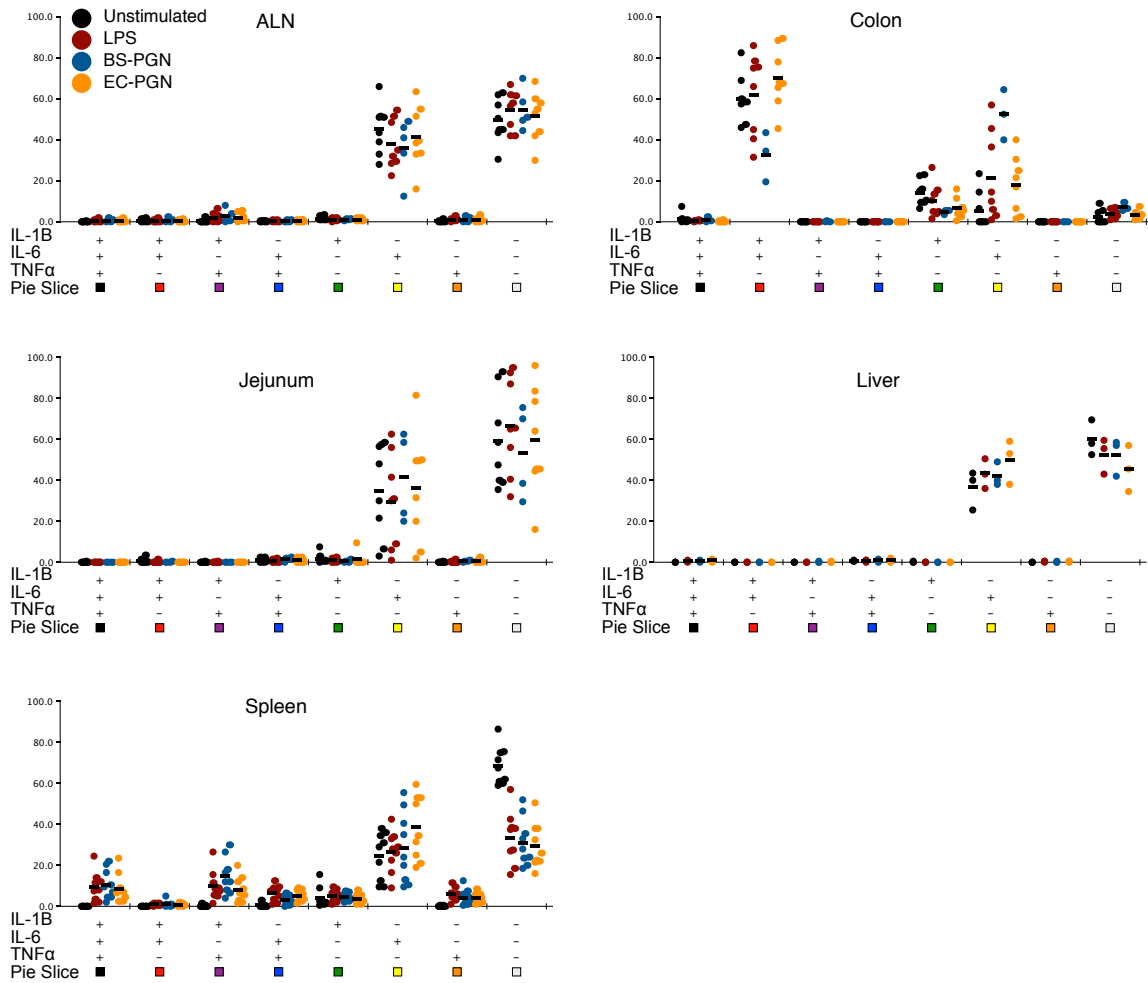

**Supplementary Figure 2 – Absolute values of functional subsets among stimulated, bulk macrophages from SIV-uninfected animals.** Absolute percent of unstimulated (black circles), LPS-stimulated (red circles), BS-PGN stimulated (blue circles) or EC-PGN stimulated (orange circles) macrophages from SIV-uninfected animals expressing the indicated cytokine profile, in reference to relative expression pie charts as shown in Figure 3E. Line represents mean of population.

*CD11c+CD14+CD206- Macrophages (SIV-)*

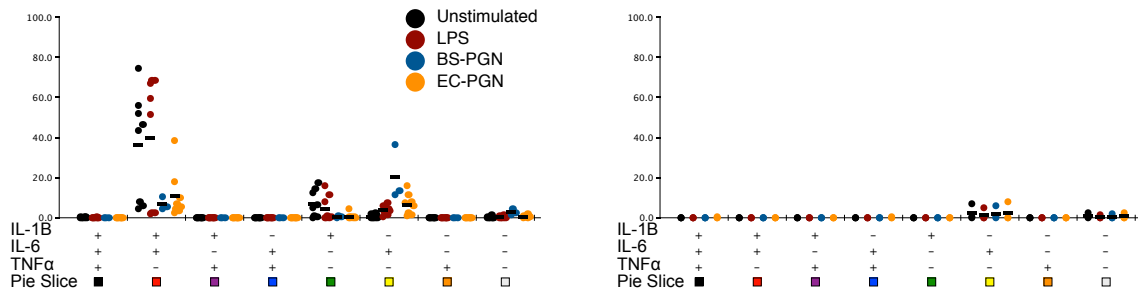

*CD11c+CD14-CD206+ Macrophages (SIV-)*

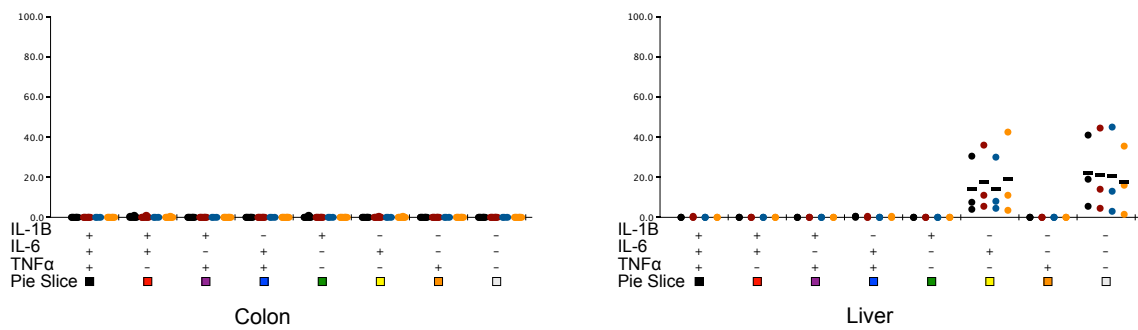

**Supplementary Figure 3 - Absolute values of functional subsets among stimulated, subset macrophages from SIV-uninfected animals.** Absolute percent CD11c+CD14+CD206- (top) or CD11c+CD14-CD206+ (bottom) unstimulated (black circles), LPS-stimulated (red circles), BS-PGN stimulated (blue circles) or EC-PGN stimulated (orange circles) macrophages expressing the indicated cytokine profile of total macrophages from SIV-uninfected animals, in reference to relative expression pie charts as shown in Figure 4. Line represents mean of population.

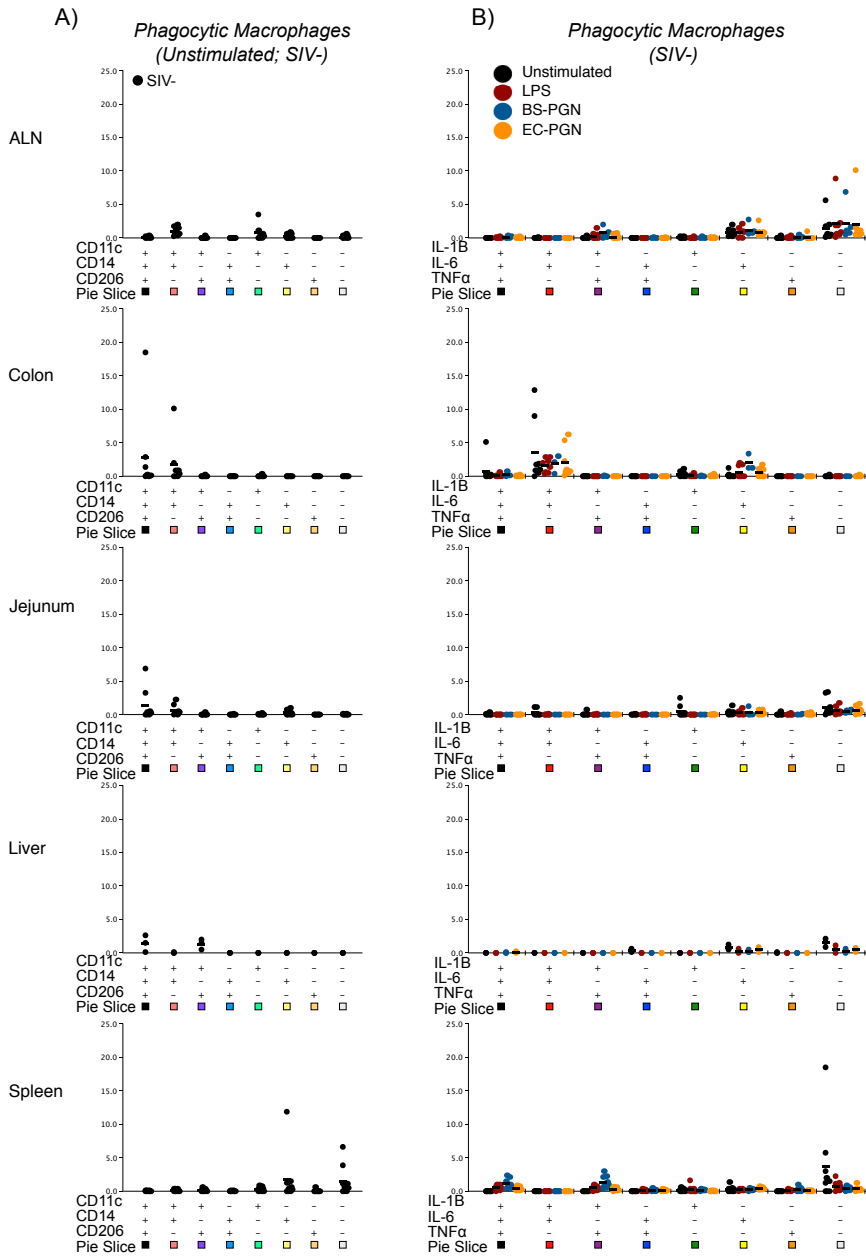

**Supplementary Figure 4 – Absolute values of phenotypic and functional subsets among stimulated, phagocytic macrophages from SIV-uninfected animals.** A. Absolute percent unstimulated, phagocytic macrophages expressing the indicated phenotype of total macrophages from SIV-uninfected (black circles) animals, in reference to relative expression pie charts as shown in Figure 5B. B. Absolute percent unstimulated (black circles), LPS-stimulated (red circles), BS-PGN stimulated (blue circles) or EC-PGN stimulated (orange circles) phagocytic macrophages expressing the indicated cytokine profile of total macrophages from SIV-uninfected animals, in reference to relative expression pie charts as shown in Figure 5C. Line represents mean of population.



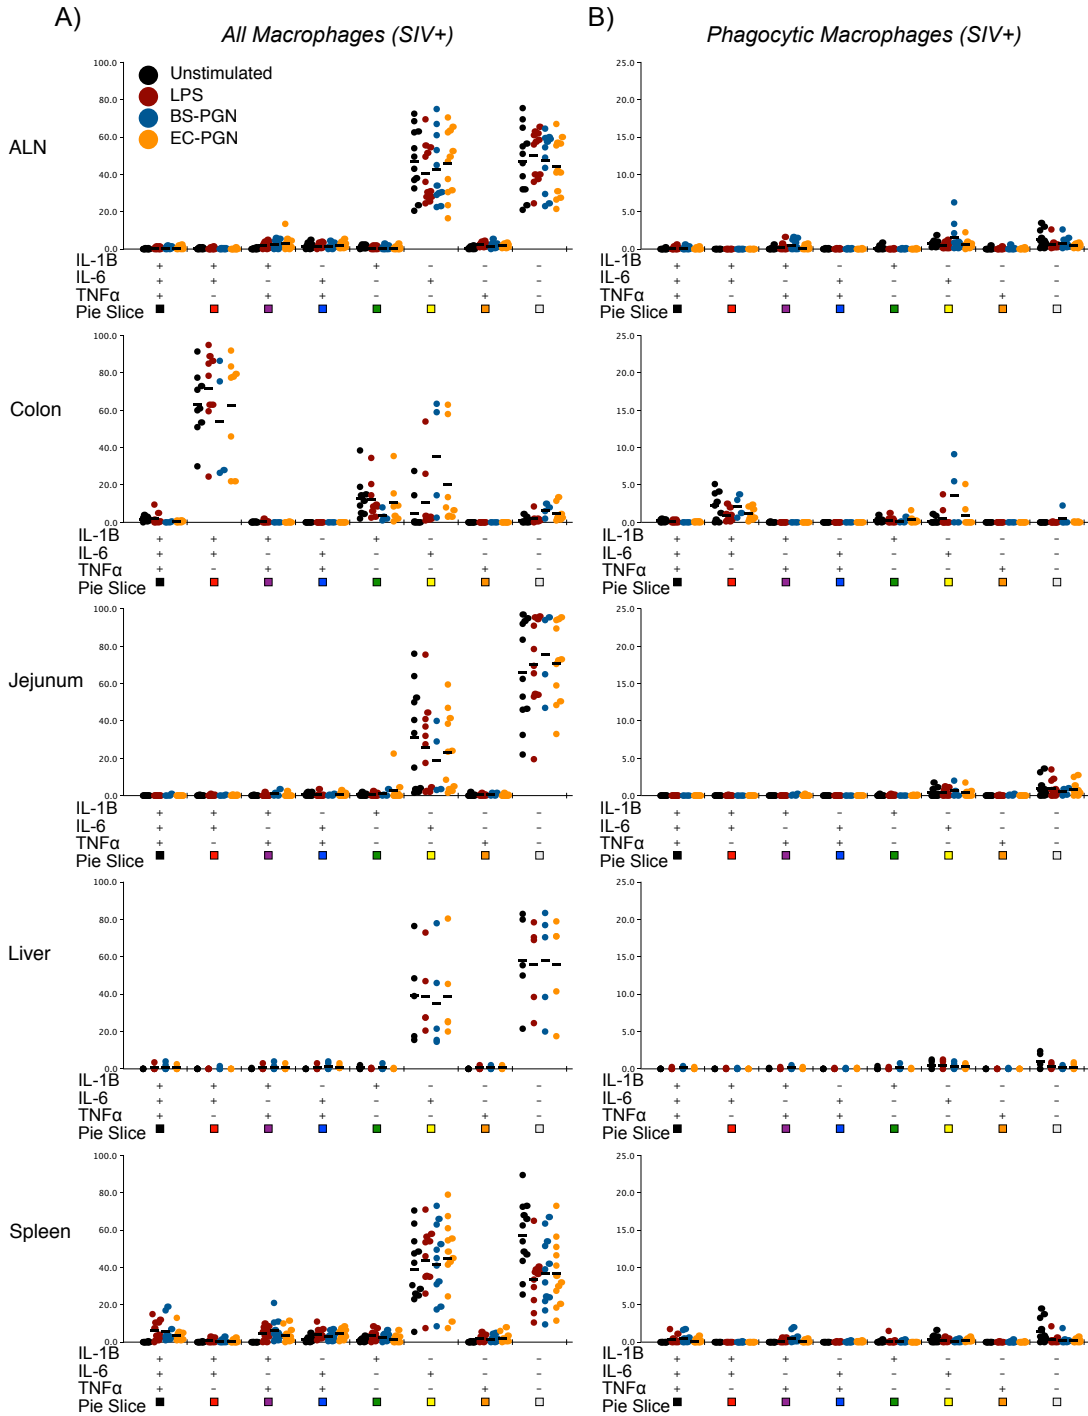

**Supplementary Figure 5 - Absolute values of functional subsets among stimulated, bulk and phagocytic macrophages from SIV-infected animals.** Absolute percent unstimulated (black circles), LPS-stimulated (red circles), BS-PGN stimulated (blue circles) or EC-PGN stimulated (orange circles) macrophages (A) or phagocytic macrophages (B) expressing the indicated cytokine profile of total macrophages from SIV-infected animals, in reference to relative expression pie charts as shown in Figures 6A and B, respectively. Line represents mean of population.
